# Supplementary material for: Vaccine Quality Is a Key Factor to Determine Thermal Stability of Commercial Newcastle Disease (ND)Vaccines
Source: Vaccines (Basel). 2021 Apr 9;9(4):363. doi: 10.3390/vaccines9040363 (PMC8069011; doi:10.3390/vaccines9040363)
Supplement: Supplementary file 1 [file vaccines-09-00363-s001.pdf]

## Supplemental Table S1: Stability of HAU in lyophilized ND-vaccines (A-F)

**Table S1c:** Lyophilized ND-vaccines (A-F) at 4 °C.

| Time (days) | HA-Titer (log2) |   |   |   |   |   |
|-------------|-----------------|---|---|---|---|---|
|             | A               | B | C | D | E | F |
| 0           | 7               | 7 | 9 | 8 | 9 | 6 |
| 7           | 7               | 8 | 9 | 7 | 9 | 6 |
| 21          | 7               | 8 | 9 | 7 | 9 | 6 |

**Table S1b:** Lyophilized ND-vaccine (A-F) at 37 °C.

| Time (days) | HA-titer (log2) |   |   |   |   |   |
|-------------|-----------------|---|---|---|---|---|
|             | A               | B | C | D | E | F |
| 0           | 7               | 7 | 9 | 8 | 9 | 6 |
| 1           | 7               | 7 | 9 | 8 | 8 | 6 |
| 3           | 7               | 7 | 9 | 8 | 8 | 6 |
| 5           | 7               | 7 | 9 | 8 | 8 | 6 |
| 7           | 7               | 7 | 9 | 8 | 8 | 6 |
| 10          | 7               | 7 | 9 | 8 | 9 | 6 |
| 14          | 7               | 7 | 9 | 8 | 9 | 6 |
| 21          | 7               | 8 | 9 | 8 | 9 | 6 |

**Table S1c:** Dissolved ND-vaccines (A-F) at 37 °C.

| Time (days) | HA-Titer (log2) |    |   |   |   |   |
|-------------|-----------------|----|---|---|---|---|
|             | A               | B  | C | D | E | F |
| 0           | 7               | 9  | 9 | 6 | 9 | 6 |
| 0,5         | 8               | 9  | 9 | 6 | 8 | 6 |
| 1           | 7               | 10 | 9 | 6 | 8 | 6 |
| 3           | 7               | 7  | 9 | 7 | 9 | 6 |
| 4           | 7               | 9  | 9 | 7 | 8 | 6 |

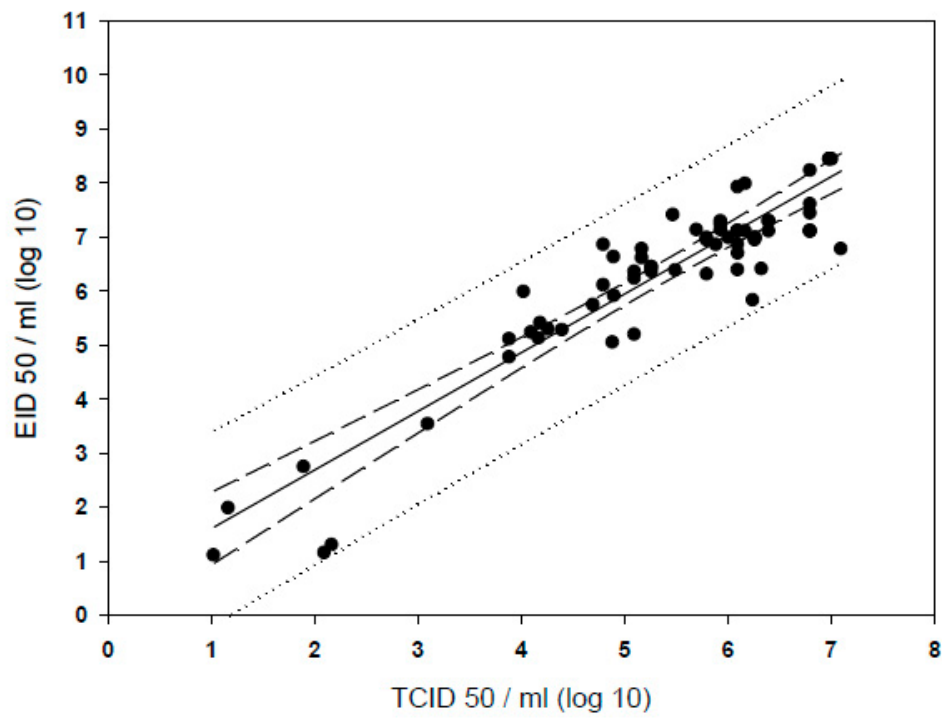

**Figure S1: Correlation of titer obtained by egg or cell culture.** Supernatants of all lentogenic virus stocks (n= 67) were titrated in parallel in SPF embryonated eggs as well as on LMH cells. Depicted is the relation between titer as egg infectious doses (EID<sub>50</sub>) and tissue culture doses (TCID<sub>50</sub>) with the correlation as well as the 95% Confidence interval (dashed lines) and the prediction intervals (dotted lines).
